# Supplementary material
Source: Frontiers journal article supplement (https://www.frontiersin.org/articles/480393)

# checkCIF/PLATON report

You have not supplied any structure factors. As a result the full set of tests cannot be run.

THIS REPORT IS FOR GUIDANCE ONLY. IF USED AS PART OF A REVIEW PROCEDURE FOR PUBLICATION, IT SHOULD NOT REPLACE THE EXPERTISE OF AN EXPERIENCED CRYSTALLOGRAPHIC REFEREE.

No syntax errors found.      CIF dictionary      Interpreting this report

## Datablock: hy

---

Bond precision:    C-C = 0.0073 A                      Wavelength=1.54184

Cell:                      a=10.4511(2)              b=13.2462(2)              c=16.0310(2)  
                            alpha=81.564(1)          beta=83.322(1)          gamma=83.508(1)  
Temperature:    200 K

|                | Calculated                          | Reported                           |
|----------------|-------------------------------------|------------------------------------|
| Volume         | 2169.95(6)                          | 2169.95(6)                         |
| Space group    | P -1                                | P -1                               |
| Hall group     | -P 1                                | -P 1                               |
| Moiety formula | 2(C32 H45 B20 N), 2(C H C13), C C13 | C H C13, 0.5(C C13), C32 H45 B20 N |
| Sum formula    | C67 H92 B40 C19 N2                  | C33.50 H46 B20 C14.50 N            |
| Mr             | 1676.88                             | 838.44                             |
| Dx,g cm-3      | 1.283                               | 1.283                              |
| Z              | 1                                   | 2                                  |
| Mu (mm-1)      | 2.961                               | 2.961                              |
| F000           | 861.0                               | 861.0                              |
| F000'          | 865.82                              |                                    |
| h,k,lmax       | 12,16,19                            | 12,16,19                           |
| Nref           | 8697                                | 8311                               |
| Tmin,Tmax      |                                     | 0.259,1.000                        |
| Tmin'          |                                     |                                    |

Correction method= # Reported T Limits: Tmin=0.259 Tmax=1.000  
AbsCorr = MULTI-SCAN

Data completeness= 0.956                      Theta(max)= 73.293

R(reflections)= 0.1071( 6767)              wR2(reflections)= 0.2627( 8311)

S = 1.082                      Npar= 551

---

The following ALERTS were generated. Each ALERT has the format

**test-name\_ALERT\_alert-type\_alert-level.**

Click on the hyperlinks for more details of the test.

### Alert level B

PLAT260\_ALERT\_2\_B Large Average Ueq of Residue Including C11A 0.188 Check

### Alert level C

DIFMN02\_ALERT\_2\_C The minimum difference density is < -0.1\*ZMAX\*0.75

\_refine\_diff\_density\_min given = -1.498

Test value = -1.275

DIFMN03\_ALERT\_1\_C The minimum difference density is < -0.1\*ZMAX\*0.75

The relevant atom site should be identified.

DIFMX02\_ALERT\_1\_C The maximum difference density is > 0.1\*ZMAX\*0.75

The relevant atom site should be identified.

|                   |                                                  |              |
|-------------------|--------------------------------------------------|--------------|
| PLAT053_ALERT_1_C | Minimum Crystal Dimension Missing (or Error) ... | Please Check |
| PLAT054_ALERT_1_C | Medium Crystal Dimension Missing (or Error) ...  | Please Check |
| PLAT055_ALERT_1_C | Maximum Crystal Dimension Missing (or Error) ... | Please Check |
| PLAT082_ALERT_2_C | High R1 Value .....                              | 0.11 Report  |
| PLAT084_ALERT_3_C | High wR2 Value (i.e. > 0.25) .....               | 0.26 Report  |
| PLAT097_ALERT_2_C | Large Reported Max. (Positive) Residual Density  | 1.65 eA-3    |
| PLAT098_ALERT_2_C | Large Reported Min. (Negative) Residual Density  | -1.50 eA-3   |
| PLAT213_ALERT_2_C | Atom C7 has ADP max/min Ratio .....              | 3.4 oblate   |
| PLAT260_ALERT_2_C | Large Average Ueq of Residue Including C11       | 0.109 Check  |
| PLAT340_ALERT_3_C | Low Bond Precision on C-C Bonds .....            | 0.00729 Ang. |

### Alert level G

|                   |                                                  |              |
|-------------------|--------------------------------------------------|--------------|
| PLAT003_ALERT_2_G | Number of Uiso or Uij Restrained non-H Atoms ... | 2 Report     |
| PLAT012_ALERT_1_G | No _shelx_res_checksum Found in CIF .....        | Please Check |
| PLAT042_ALERT_1_G | Calc. and Reported MoietyFormula Strings Differ  | Please Check |
| PLAT045_ALERT_1_G | Calculated and Reported Z Differ by a Factor ... | 0.50 Check   |
| PLAT083_ALERT_2_G | SHELXL Second Parameter in WGHT Unusually Large  | 14.07 Why ?  |
| PLAT153_ALERT_1_G | The s.u.'s on the Cell Axes are Equal ..(Note)   | 0.0002 Ang.  |
| PLAT154_ALERT_1_G | The s.u.'s on the Cell Angles are Equal ..(Note) | 0.001 Degree |
| PLAT186_ALERT_4_G | The CIF-Embedded .res File Contains ISOR Records | 2 Report     |
| PLAT300_ALERT_4_G | Atom Site Occupancy of C11A Constrained at       | 0.5 Check    |
| PLAT300_ALERT_4_G | Atom Site Occupancy of C10A Constrained at       | 0.5 Check    |
| PLAT300_ALERT_4_G | Atom Site Occupancy of C13 Constrained at        | 0.5 Check    |
| PLAT300_ALERT_4_G | Atom Site Occupancy of C0AA Constrained at       | 0.5 Check    |
| PLAT302_ALERT_4_G | Anion/Solvent/Minor-Residue Disorder (Resd 3 )   | 100% Note    |
| PLAT343_ALERT_2_G | Unusual sp? Angle Range in Main Residue for      | C17 Check    |
| PLAT343_ALERT_2_G | Unusual sp? Angle Range in Main Residue for      | C18 Check    |
| PLAT343_ALERT_2_G | Unusual sp? Angle Range in Main Residue for      | C19 Check    |
| PLAT343_ALERT_2_G | Unusual sp? Angle Range in Main Residue for      | C20 Check    |
| PLAT367_ALERT_2_G | Long? C(sp?)-C(sp?) Bond C17 - C18 .             | 1.74 Ang.    |
| PLAT367_ALERT_2_G | Long? C(sp?)-C(sp?) Bond C18 - C21 .             | 1.51 Ang.    |
| PLAT367_ALERT_2_G | Long? C(sp?)-C(sp?) Bond C19 - C20 .             | 1.73 Ang.    |
| PLAT432_ALERT_2_G | Short Inter X...Y Contact C11A ..C0AA            | 1.58 Ang.    |
|                   | 2-x,2-y,-z =                                     | 2_775 Check  |
| PLAT432_ALERT_2_G | Short Inter X...Y Contact C10A ..C0AA            | 2.05 Ang.    |
|                   | 2-x,2-y,-z =                                     | 2_775 Check  |
| PLAT432_ALERT_2_G | Short Inter X...Y Contact C13 ..C0AA             | 1.62 Ang.    |
|                   | 2-x,2-y,-z =                                     | 2_775 Check  |
| PLAT432_ALERT_2_G | Short Inter X...Y Contact C0AA ..C0AA            | 1.09 Ang.    |
|                   | 2-x,2-y,-z =                                     | 2_775 Check  |
| PLAT720_ALERT_4_G | Number of Unusual/Non-Standard Labels .....      | 23 Note      |
| PLAT773_ALERT_2_G | Check long C-C Bond in CIF: C17 --C18            | 1.74 Ang.    |
| PLAT773_ALERT_2_G | Check long C-C Bond in CIF: C19 --C20            | 1.73 Ang.    |

|                   |                                           |                   |   |       |       |
|-------------------|-------------------------------------------|-------------------|---|-------|-------|
| PLAT779_ALERT_4_G | Suspect or Irrelevant (Bond) Angle in CIF | ....              | # | 12    | Check |
|                   | C0AA -CLOA -C0AA                          | 1.555 1.555 2.775 |   | 32.10 | Deg.  |
| PLAT779_ALERT_4_G | Suspect or Irrelevant (Bond) Angle in CIF | ....              | # | 477   | Check |
|                   | C0AA -CL1A -C0AA                          | 2.775 1.555 1.555 |   | 37.90 | Deg.  |
| PLAT779_ALERT_4_G | Suspect or Irrelevant (Bond) Angle in CIF | ....              | # | 483   | Check |
|                   | C0AA -CL3 -C0AA                           | 1.555 1.555 2.775 |   | 40.40 | Deg.  |
| PLAT779_ALERT_4_G | Suspect or Irrelevant (Bond) Angle in CIF | ....              | # | 490   | Check |
|                   | CL1A -C0AA -CL3                           | 2.775 1.555 2.775 |   | 38.50 | Deg.  |
| PLAT779_ALERT_4_G | Suspect or Irrelevant (Bond) Angle in CIF | ....              | # | 496   | Check |
|                   | CL3 -C0AA -CL1A                           | 1.555 1.555 1.555 |   | 36.70 | Deg.  |
| PLAT860_ALERT_3_G | Number of Least-Squares Restraints        | .....             |   | 12    | Note  |

---

0 **ALERT level A** = Most likely a serious problem - resolve or explain  
 1 **ALERT level B** = A potentially serious problem, consider carefully  
 13 **ALERT level C** = Check. Ensure it is not caused by an omission or oversight  
 33 **ALERT level G** = General information/check it is not something unexpected

10 ALERT type 1 CIF construction/syntax error, inconsistent or missing data  
 22 ALERT type 2 Indicator that the structure model may be wrong or deficient  
 3 ALERT type 3 Indicator that the structure quality may be low  
 12 ALERT type 4 Improvement, methodology, query or suggestion  
 0 ALERT type 5 Informative message, check

---

It is advisable to attempt to resolve as many as possible of the alerts in all categories. Often the minor alerts point to easily fixed oversights, errors and omissions in your CIF or refinement strategy, so attention to these fine details can be worthwhile. In order to resolve some of the more serious problems it may be necessary to carry out additional measurements or structure refinements. However, the purpose of your study may justify the reported deviations and the more serious of these should normally be commented upon in the discussion or experimental section of a paper or in the "special\_details" fields of the CIF. checkCIF was carefully designed to identify outliers and unusual parameters, but every test has its limitations and alerts that are not important in a particular case may appear. Conversely, the absence of alerts does not guarantee there are no aspects of the results needing attention. It is up to the individual to critically assess their own results and, if necessary, seek expert advice.

### Publication of your CIF in IUCr journals

A basic structural check has been run on your CIF. These basic checks will be run on all CIFs submitted for publication in IUCr journals (*Acta Crystallographica*, *Journal of Applied Crystallography*, *Journal of Synchrotron Radiation*); however, if you intend to submit to *Acta Crystallographica Section C* or *E* or *IUCrData*, you should make sure that full publication checks are run on the final version of your CIF prior to submission.

### Publication of your CIF in other journals

Please refer to the *Notes for Authors* of the relevant journal for any special instructions relating to CIF submission.

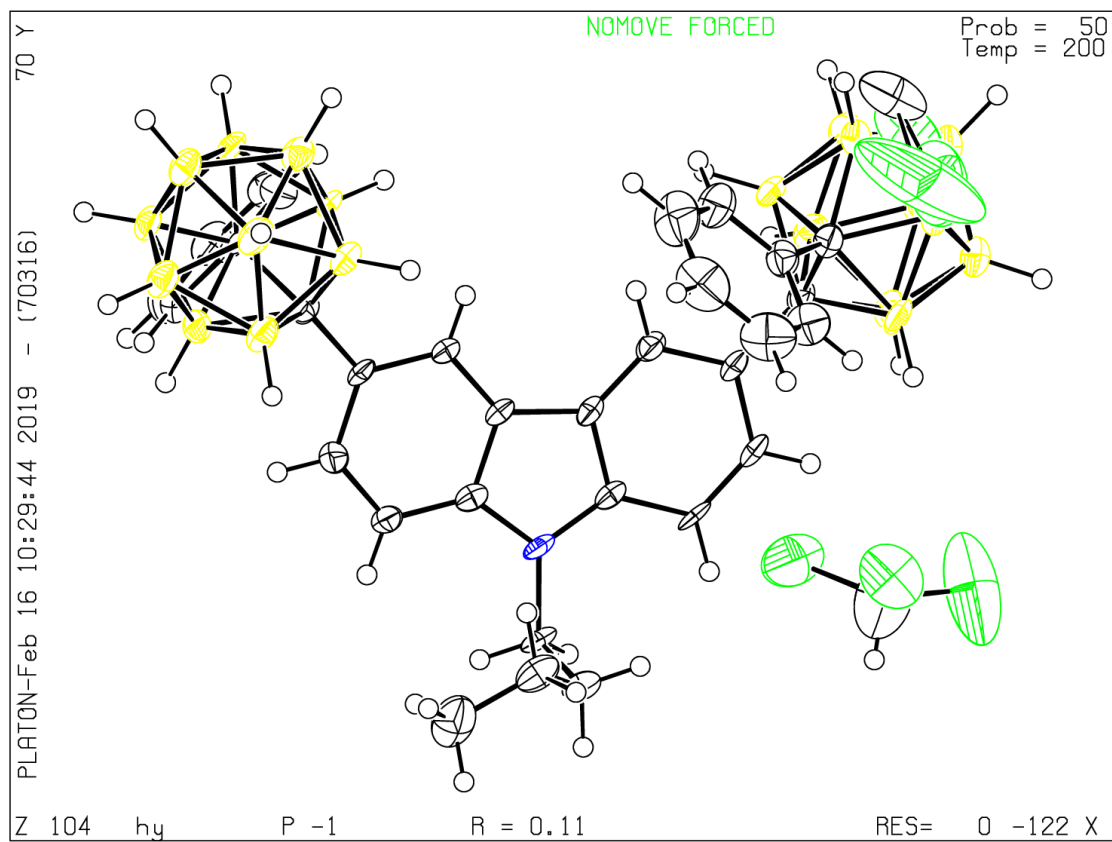

Supplement: Data_Sheet_1.PDF [file Data_Sheet_1.PDF]
